# Supplementary material for: Longitudinal characterization of circulating extracellular vesicles and small RNA during simian immunodeficiency virus infection and antiretroviral therapy
Source: PubMed Central journal article supplement — AIDS. 2023 Feb 4;37(5):733–44. doi: 10.1097/QAD.0000000000003487 (PMC9994802; doi:10.1097/qad.0000000000003487), 2023-02-04

Figure S1

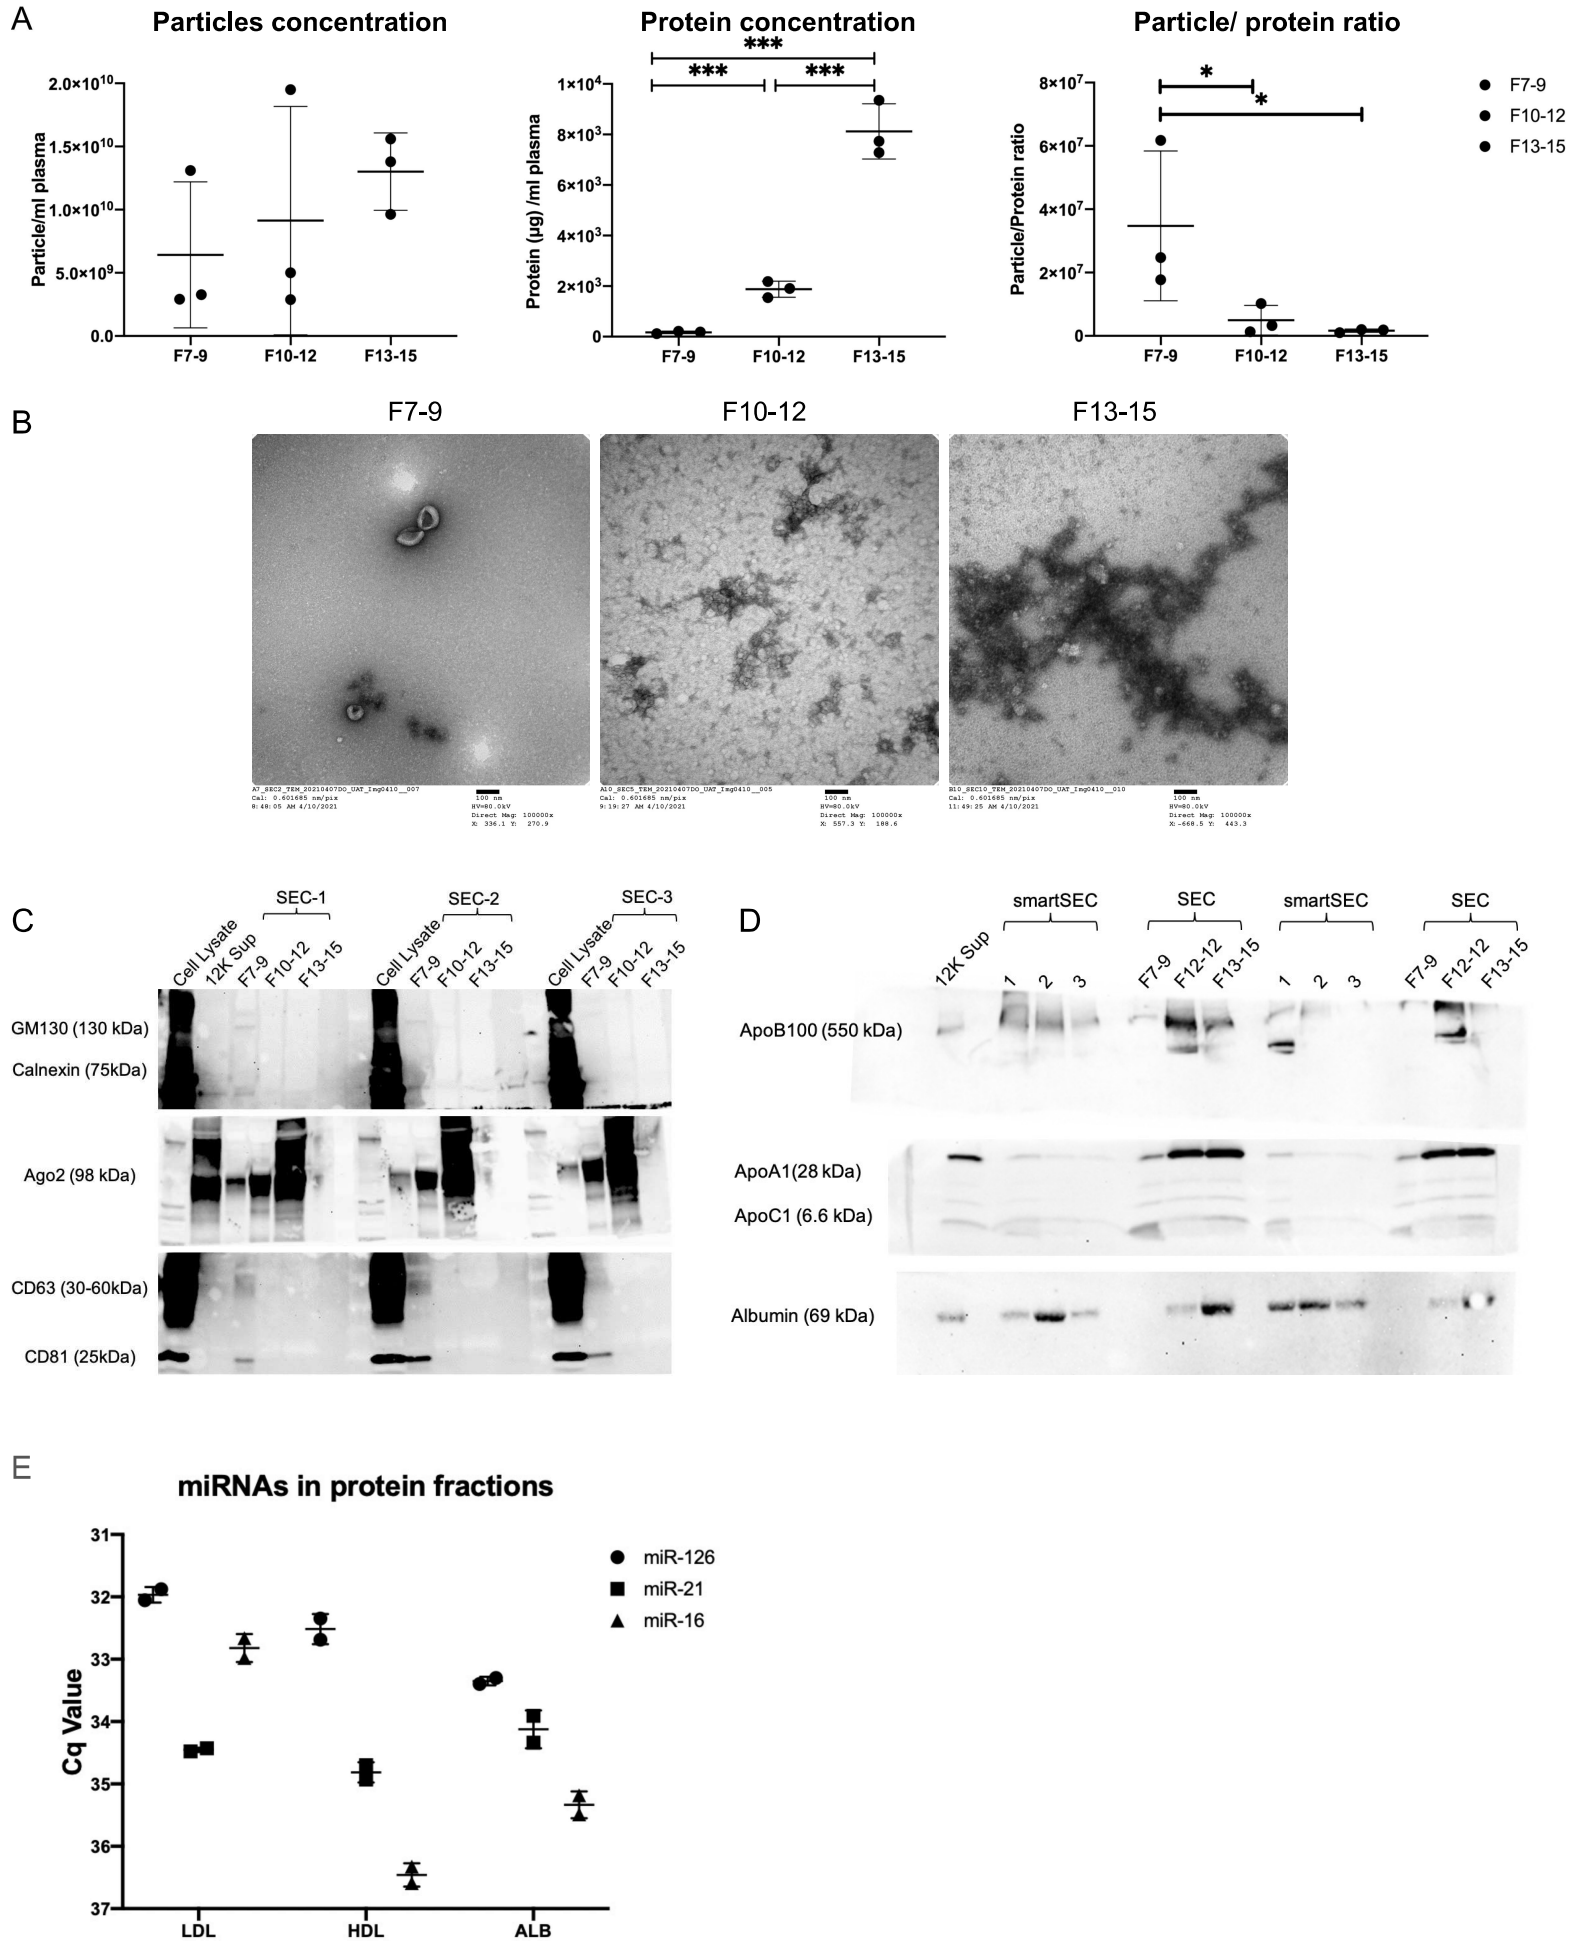

Figure S2

Pigtailed macaques (Groups A and B)

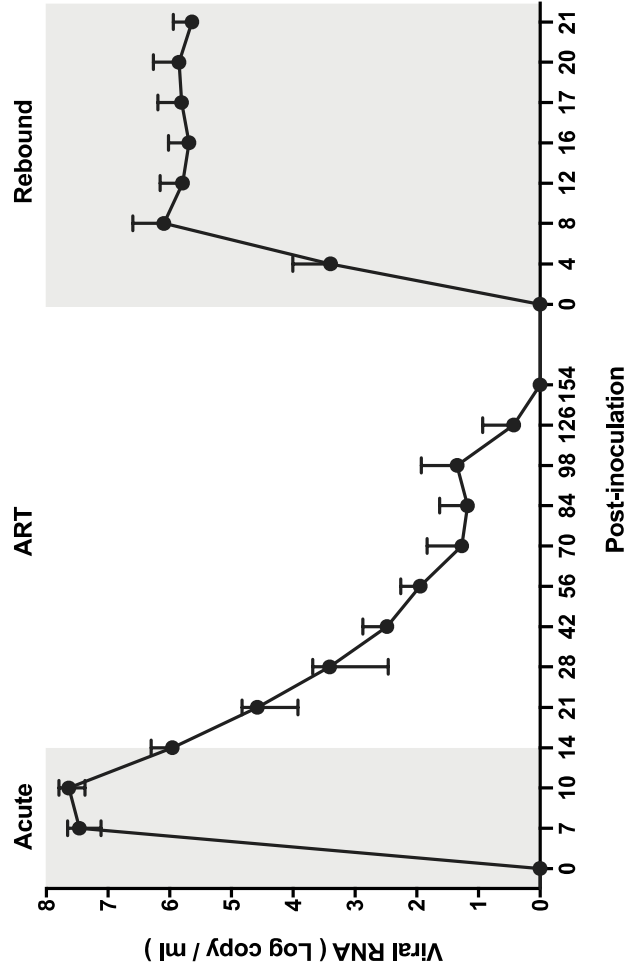

Rhesus macaques (Group C)

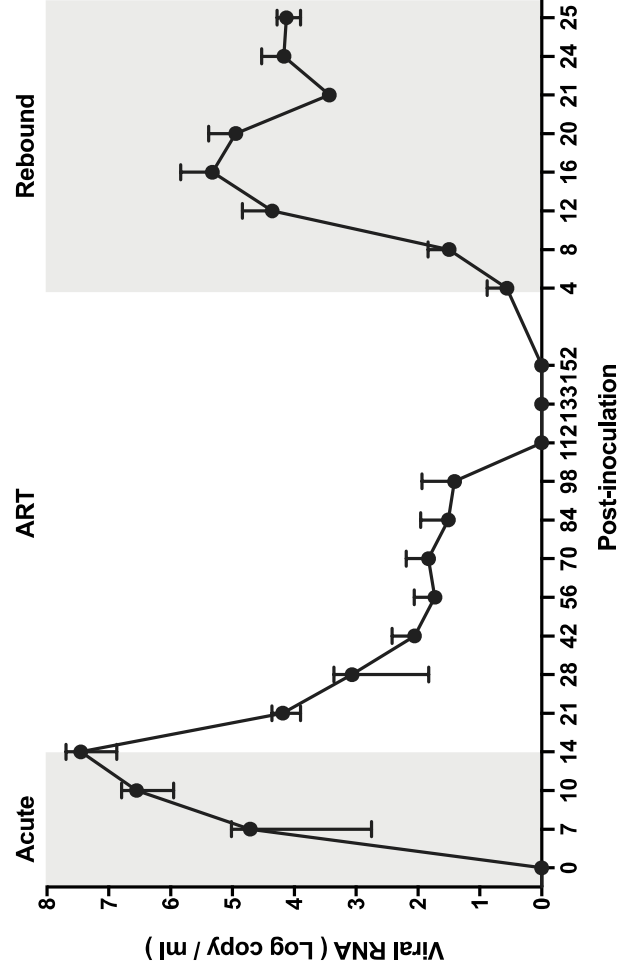



Figure S4

|                       | Group A                                                                                                                                  | Group B                                            | Group C                   |
|-----------------------|------------------------------------------------------------------------------------------------------------------------------------------|----------------------------------------------------|---------------------------|
|                       | miR-342-3p<br>U6 snRNA<br>miR-29a-3p<br>miR-145-5p<br>miR-181a-5p<br>miR-193b-3p<br>miR-195-5p<br>miR-19a-3p<br>miR-328-3p<br>miR-451-5p | miR-342-3p<br>U6 snRNA<br>miR-29a-3p<br>miR-145-5p | miR-342-3p<br>U6 snRNA    |
| <b>Pre vs Acute</b>   |                                                                                                                                          |                                                    |                           |
|                       | miR-125b-5p<br>miR-146a-5p<br>miR-181a-5p<br>miR-21-5p                                                                                   |                                                    | miR-638-5p                |
| <b>Pre vs Latent</b>  |                                                                                                                                          | let-7c-5p<br>miR-192-5p                            | miR-342-3p                |
|                       | miR-192-5p<br>miR-342-3p<br>miR-146b-5p<br>miR-125b-5p<br>miR-145-5p<br>miR-181a-5p<br>let-7c-5p                                         |                                                    | miR-342-3p<br>miR-146b-5p |
| <b>Pre vs Rebound</b> |                                                                                                                                          | miR-454-3p                                         | miR-638-5p<br>miR-1290-3p |

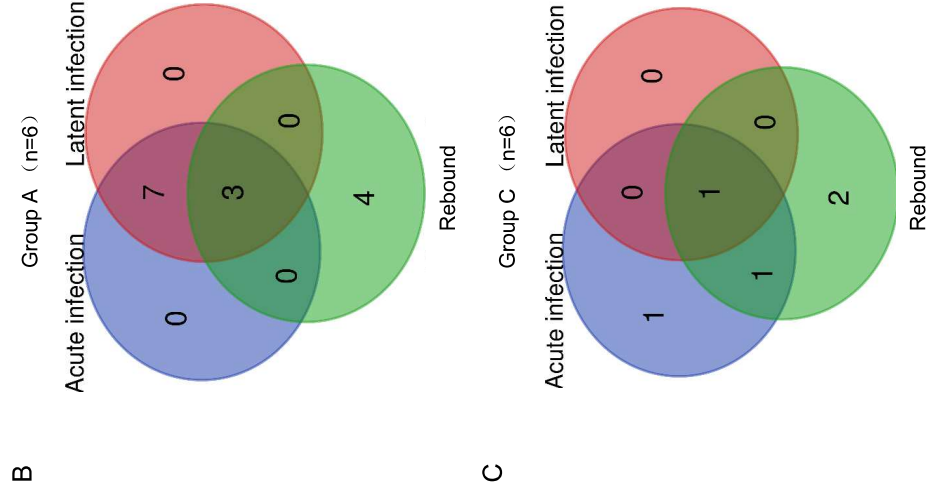

Figure S5 A

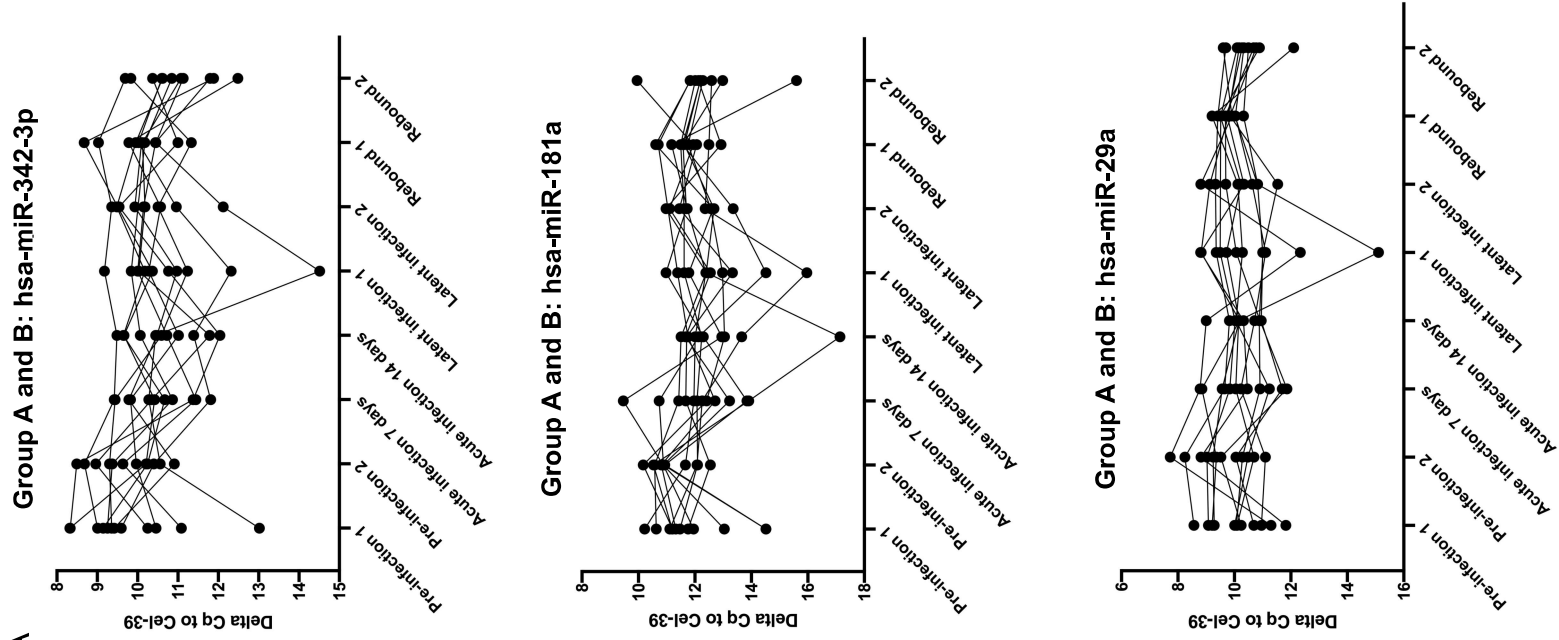

B

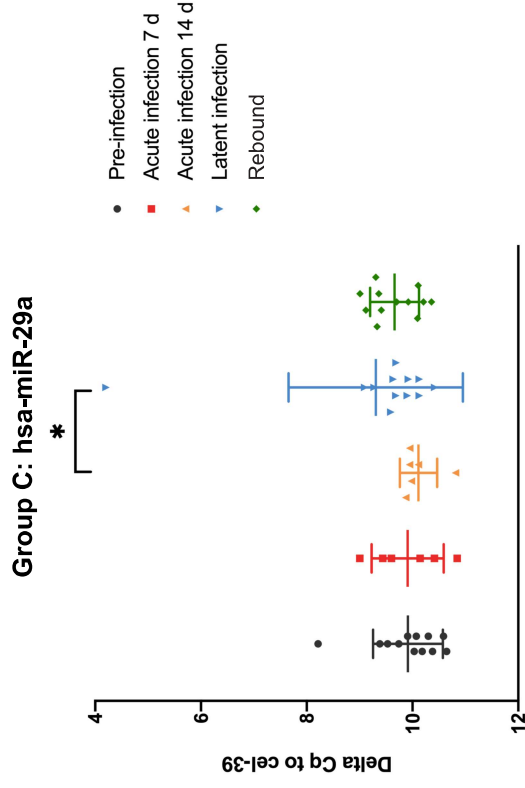

C

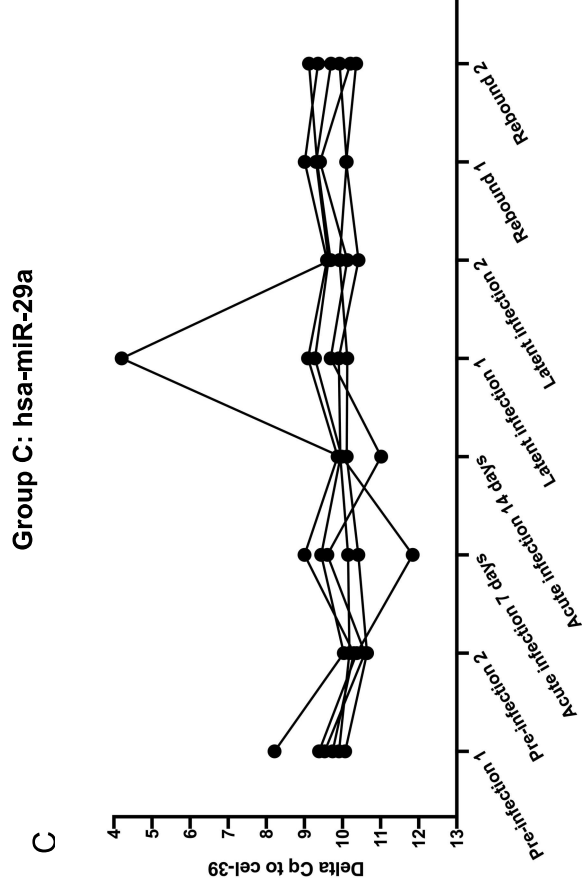

Figure S6

A

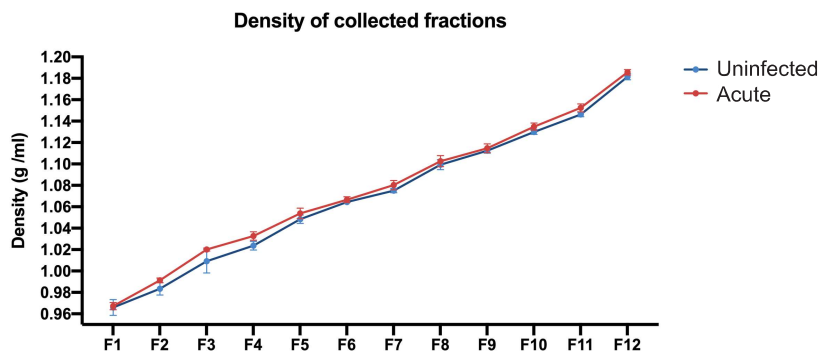

C

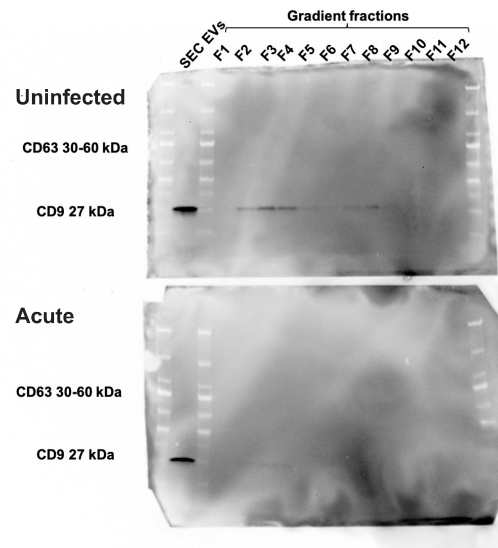

B

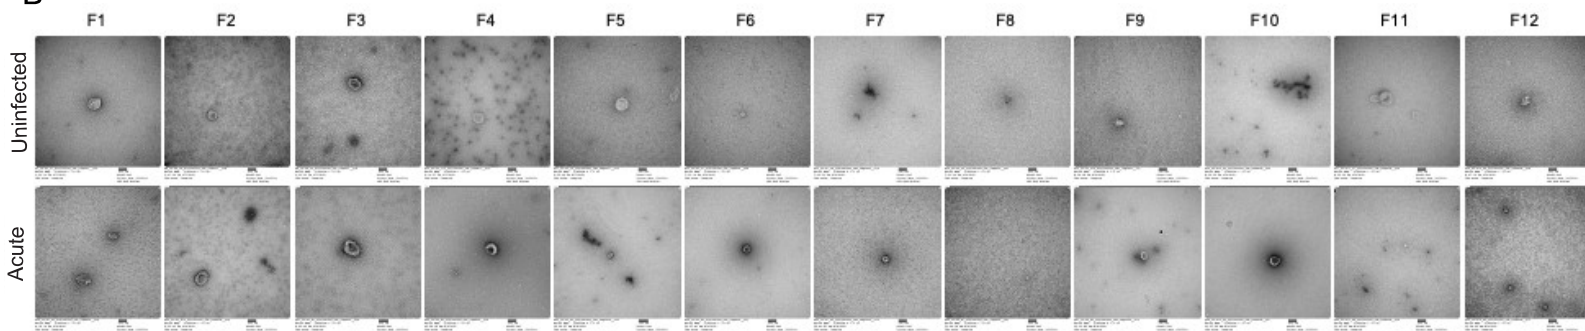

D

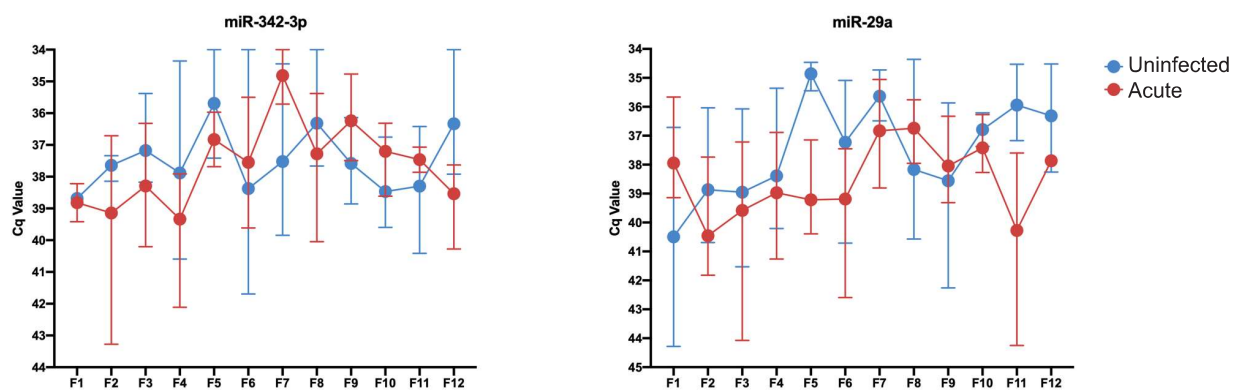

Supplement: aids-37-733-s001.pdf [file aids-37-733-s001.pdf]
